# Supplementary material for: Escherichia coli adhesin protein-conjugated thermal responsive hybrid nanoparticles for photothermal and immunotherapy against cancer and its metastasis
Source: PubMed Central journal article supplement — J Immunother Cancer. 2021 Jul 6;9(7):e002666. doi: 10.1136/jitc-2021-002666 (PMC8261870; doi:10.1136/jitc-2021-002666), 2021-07-06
Supplement: jitc-2021-002666supp001.pdf [file jitc-2021-002666supp001.pdf]

## Supporting Information

### ***Escherichia coli* adhesin protein-conjugated thermal responsive hybrid nanoparticles for photothermal and immunotherapy against cancer and its metastasis**

Juyoung Hwang<sup>1,2,3</sup>, Wei Zhang<sup>1</sup>, Hae-Bin Park<sup>1,2,3</sup>, Yadav Dhananjay<sup>2,3</sup>, Yong Hyun Jeon<sup>4</sup> and Jun-O Jin<sup>1, 2,3,\*</sup>

<sup>1</sup> Shanghai Public Health Clinical Center & Institutes of Biomedical Sciences, Shanghai Medical College, Fudan University, Shanghai, 201508, China

<sup>2</sup> Department of Medical Biotechnology, Yeungnam University, Gyeongsan 38541, South Korea

<sup>3</sup> Research Institute of Cell Culture, Yeungnam University, Gyeongsan, 38541, South Korea

<sup>4</sup> Laboratory Animal Center, Daegu-Gyeongbuk Medical Innovation Foundation, Daegu, 41404, South Korea

\*Corresponding author. E-mail: jinjo@yu.ac.kr

## Materials and Methods

### Purification of FimH

The purification of recombinant FimH has been described in detail in a previous study.<sup>43</sup> Briefly, competent BL21 cells and the pET28a-FimH plasmid were mixed on ice for 30 min. The cells were incubated for 60–90 s in a 42 °C water bath and then quickly transferred to ice. The transformed BL21 cells were incubated in a Luria-Bertani (LB) medium, for 1 h, in a 37 °C shaking incubator at  $0.94 \times g$  ( $g = r \times 11.18 \times 10^6 \times \text{RPM}^2$ ), and the cells were grown overnight at 37 °C in LB containing kanamycin. After incubation, a single colony was transferred from the culture medium to 1 L of LB, containing kanamycin, and centrifuged at  $1.41 \times g$  and 37 °C. After harvesting BL21 cells the following day, the cells were lysed using 60% power of ultrasonication for 15 min. The disrupted cells were centrifuged at  $10,000 \times g$  for 15 min, and the supernatant was collected. Using a low-pressure chromatography system, the Ni-IDA column was equilibrated with equilibration buffer (pH 8.0, 8 M urea, 100 mM Tris, and 100 mM  $\text{NaH}_2\text{PO}_4$ ) at 0.5 mL/min flow rate. The supernatant was loaded through an equilibrated column at the same flow rate. When the  $\text{OD}_{280}$  value reached baseline, the column was washed with an Ni-IDA wash buffer (pH 6.3, 8 M urea, 100 mM Tris, and 100 mM  $\text{NaH}_2\text{PO}_4$ ) at 1 mL/min flow rate. After the  $\text{OD}_{280}$  value reached baseline, a Ni-IDA elution buffer (pH 4.5, 8 M urea, 100 mM Tris, and 100 mM  $\text{NaH}_2\text{PO}_4$ ) was loaded at a flow rate of 1 mL/min, and FimH was eluted from the collected effluent.

### Measurement of photothermal conversion efficiency

The F-TRH solution (0.2 mg/mL) was irradiated with an 808 nm laser at a power density of 2.0 W/cm<sup>2</sup> for 10 min. The photothermal efficiency of F-TRH was calculated using the following formula:

$$\eta = \frac{hA(T_{max} - T_{surr}) - Q_{dis}}{I(1 - 10^{-A_{808}})} \times 100\%$$

where  $h$  is the heat transfer coefficient,  $A$  is the surface area of the container,  $T_{max}$  is the reached equilibrium temperature,  $T_{surr}$  is the ambient temperature,  $Q_{dis}$  is the heat associated with the light absorbance,  $I$  is the laser power density, and  $A_{808}$  is the absorbance of F-TRH at 808 nm.

**Supplemental results****Figure S1**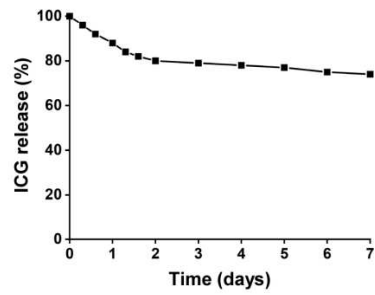

**Figure S1.** Cumulative release of ICG in F-TRHs through laser irradiation. The percentage of the ICG released was measured in the supernatant after the indicated time.

Figure S2

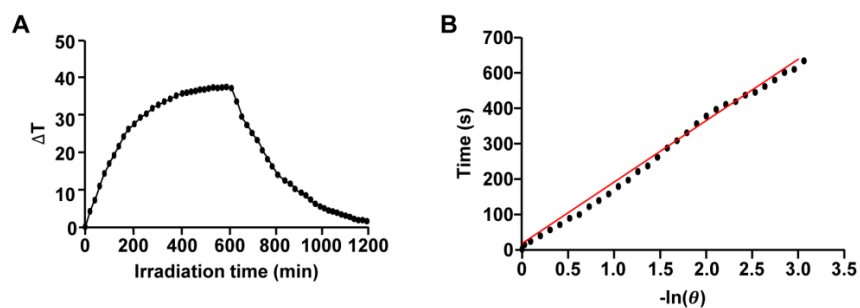

**Figure S2.** (A) Photothermal effect of F-TRH (0.2 mg/mL) under 808 nm laser irradiation (2 W/cm<sup>-1</sup>) for 10 min. (B) Linear time data *versus*  $-\ln\theta$  obtained from the cooling time in (A).

**Figure S3**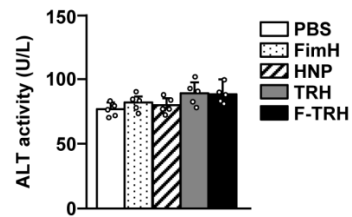

**Figure S3.** Levels of alanine aminotransferase (ALT) in mice sera. CT-26-bearing mice were intratumorally (*i.t.*) injected with PBS, FimH, HNP, TRH, and F-TRH with NIR laser irradiation (2 W/cm<sup>2</sup>, 5 min). ALT levels in the blood serum were determined 24 h after treatment.

Figure S4

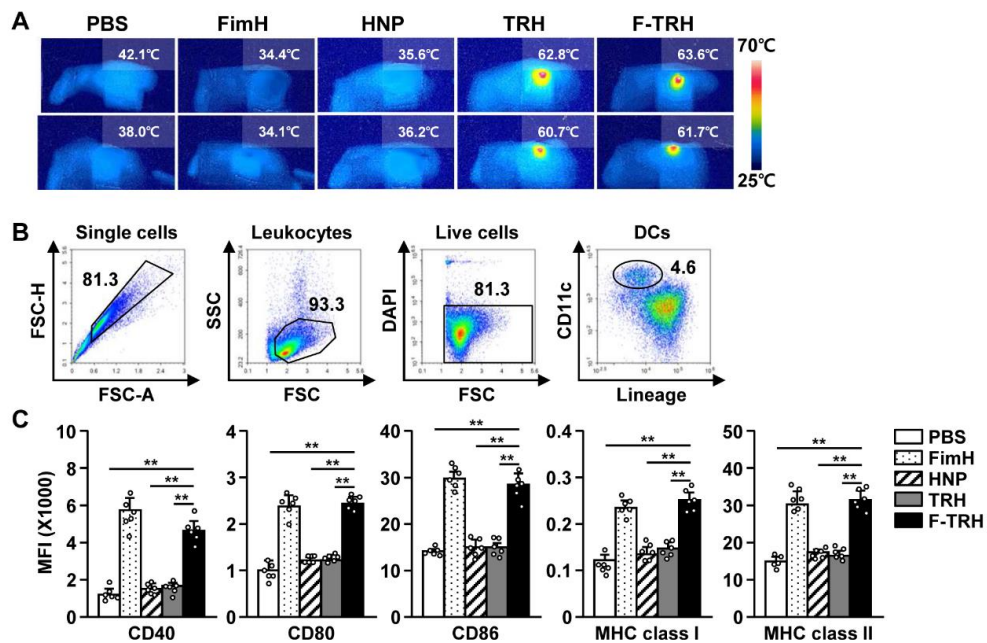

**Figure S4.** F-TRH treatment with laser irradiation promoted the activation of splenic DCs. CT-26-bearing mice were *i.t.* injected with PBS, FimH, HNP, TRH, and F-TRH followed by NIR laser irradiation (2 W/cm<sup>2</sup>, 5 min). (A) The elevated temperature by NIR laser irradiation is shown. (B) Definition of DCs in the spleen. (C) The mean fluorescence intensities of the co-stimulatory molecules and MHC class I and II were analyzed 18 h after treatment. The data are representative of the average of the analyses of six independent samples.

Figure S5

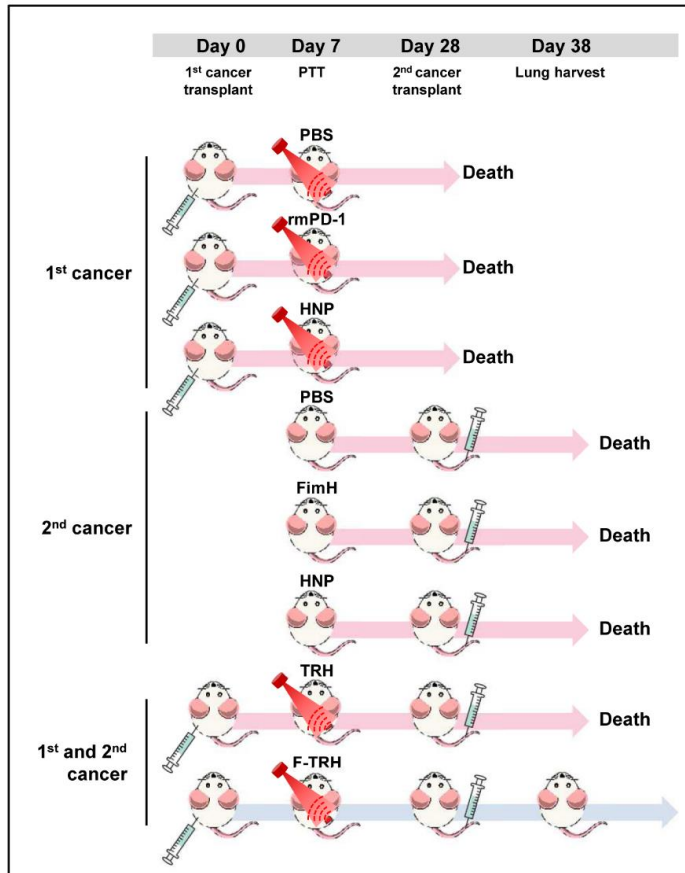

**Figure S5.** Schematic illustration of the 1<sup>st</sup> and 2<sup>nd</sup> tumor challenge models and treatment strategies.



**Figure S6**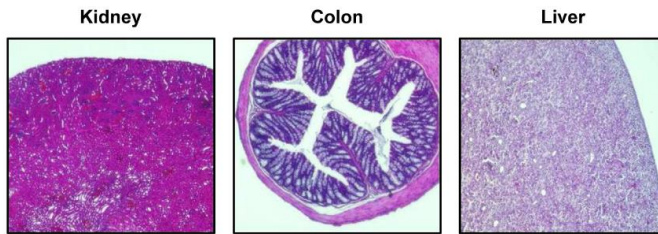

**Figure S6.** Hematoxylin and eosin (H&E) staining of peripheral tissues. On day 49 following the 1<sup>st</sup> tumor challenge, the cured mice, via F-TRH with NIR laser irradiation, were sacrificed, and the kidney, colon, and liver were stained with H&E.

Figure S7

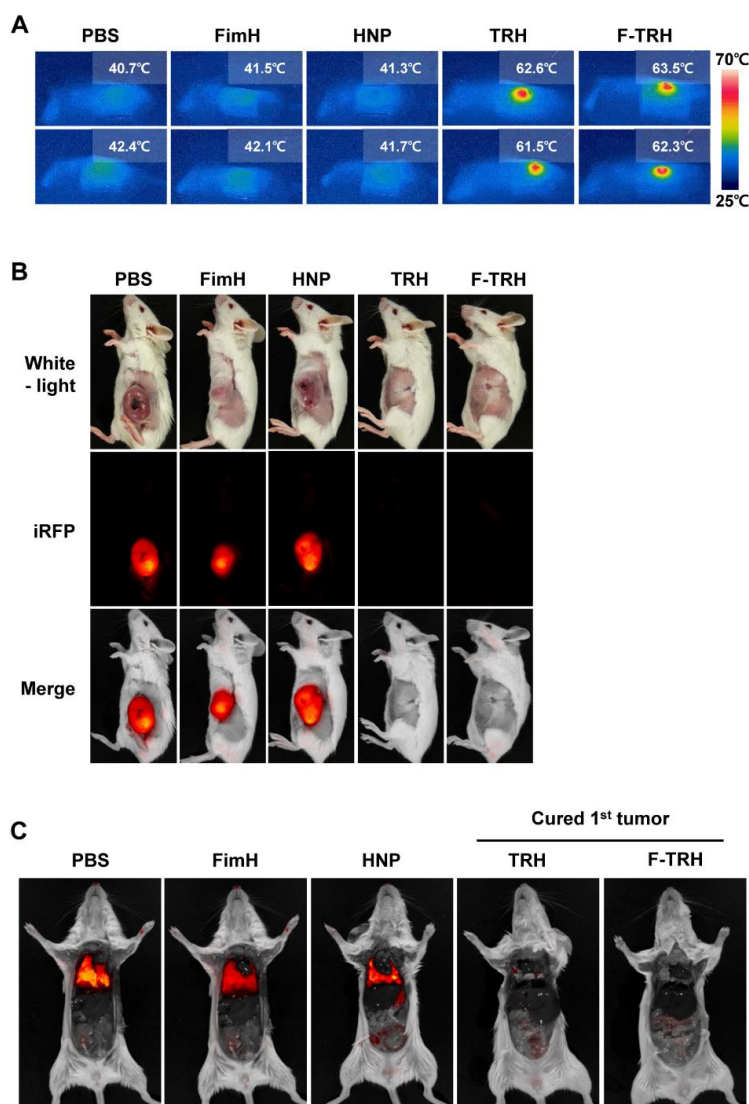

**Figure S7.** Anticancer and antimetastatic effects of F-TRH against 4T1 breast cancer cells. (A) The thermographic images of 4T1 tumor-bearing BALB/c mice which were treated with PBS, FimH, HNP, TRH, and F-TRH, followed by NIR laser irradiation ( $2 \text{ W/cm}^2$ , 5 min) on day 7 after the tumor challenge,  $n = 5$ . (B) Fluorescence images of 4T1-iRFP tumor-bearing mice on day 17,  $n = 5$ . (C) Fluorescence images of metastatic 4T1-iRFP cell infiltration in the lung was detected on day 10 after the 2<sup>nd</sup> challenged 4T1-iRFP cancer,  $n = 5$ .

Figure S8

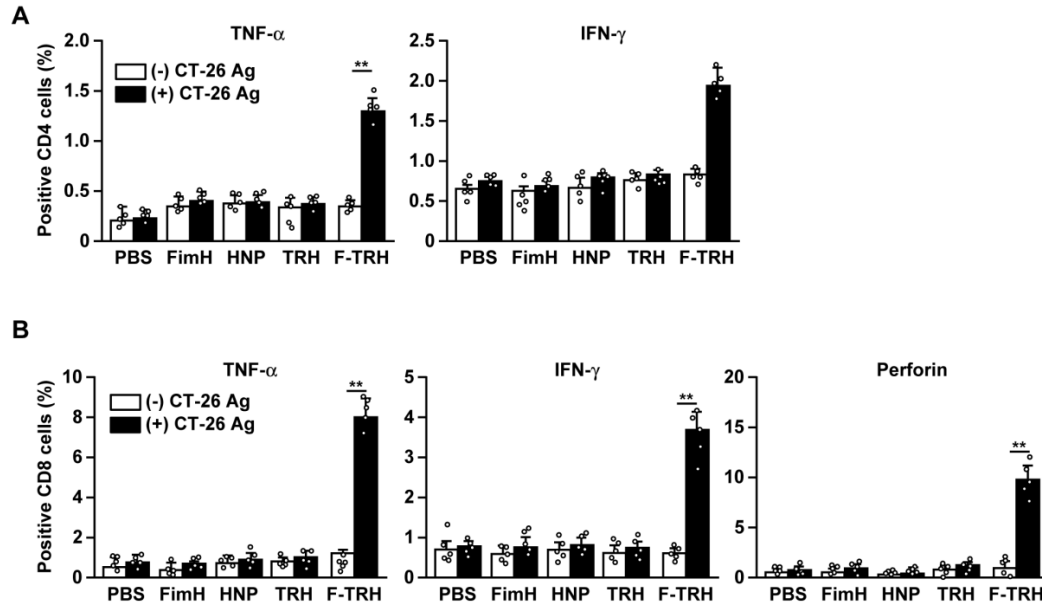

**Figure S8.** Ag-specific T-cell activation. On day 10 of the 2<sup>nd</sup> tumor challenge, the splenocytes were incubated with or without CT-26 Ag for 24 h. Intracellular cytokine levels in CD4 (A) and CD8 (B) were measured,  $n = 5$ ,  $**p < 0.01$ .
